# Supplementary material for: Cosmogenic 10 Be in pyroxene: laboratory progress, production rate systematics, and application of the 10 Be– 3 He nuclide pair in the Antarctic Dry Valleys
Source: Copernicus journal article supplement (doi:10.5194/gchron-5-301-2023), 2023-07-17
Supplement: Supplementary file 2 [file gchron-5-301-2023-supplement.zip]

Archive with 8 entries (8 files):
- Balter-Kennedy 2022 - GChron - Supplemental Information - FINAL.pdf
- Table S3 - CRONUS-P He-3 Data.xlsx
- Table S1 - SULA_LABCO OES Data.xlsx
- Table S2 - CRPG LABCO Pyroxenes lava composition SARM.xls
- Table S6 - CRPGWR_XRF.xlsx
- gchron-5-301-2023-supplement-title-page.pdf
- Table S5 - Blanks.xlsx
- Table S4 - Beryllium data.xlsx
