# Supplementary material for: Cosmogenic 10 Be in pyroxene: laboratory progress, production rate systematics, and application of the 10 Be– 3 He nuclide pair in the Antarctic Dry Valleys
Source: Copernicus journal article supplement (doi:10.5194/gchron-5-301-2023), 2023-07-17
Supplement: Supplementary file 2 [file gchron-5-301-2023-supplement.zip › Table S1 - SULA_LABCO OES Data.xlsx]

## Sheet: Sheet1
OES run dates:																				LOD=below the limit of detection
20191030
20210120		Measured solution concentrations									Calculated concentrations in pyroxene
		Al	Ca	Fe	K	Mg	Mn	Na	Ti		Al	Ca	Fe	K	Mg	Mn	Na	Ti		Be
Dilution		ug/g	ug/g	ug/g	ug/g	ug/g	ug/g	ug/g	ug/g		%	%	%	%	%	%	%	%		ug/g
					(0.208ppm)
10596.2	LABCO-01	0.665857	10.8793	8.40337	LOD	9.76964	0.206537	0.083198	0.141921		0.705556	11.528	8.90439	LOD	10.3521	0.218851	0.0881583	0.150382		LOD
10060.3	LABCO-02	0.706449	11.5896	8.9067	LOD	9.9817	0.217047	0.0907823	0.15432		0.710712	11.6596	8.96045	LOD	10.0419	0.218356	0.0913302	0.155251		LOD
10268.8	LABCO-03	0.659138	10.9324	8.973	LOD	10.0755	0.218094	0.0836404	0.146729		0.676857	11.2263	9.21421	LOD	10.3464	0.223956	0.0858888	0.150673		LOD
9682.22	LABCO-04	0.683994	11.3733	9.90317	LOD	10.4821	0.23604	0.0886624	0.161632		0.662258	11.0119	9.58847	LOD	10.149	0.228539	0.0858449	0.156496		LOD
10282.6	LABCO-05	1.03639	10.364	8.69672	LOD	9.94012	0.209859	0.0734842	0.130453		1.06568	10.6569	8.94252	LOD	10.2211	0.21579	0.0755612	0.13414		LOD
10111.2	LABCO-06	2.47223	13.0767	7.45757	LOD	8.57875	0.180569	0.082033	0.116003		2.49971	13.222	7.54047	LOD	8.67411	0.182576	0.0829449	0.117293		LOD
10054.6	LABCO-07	1.71709	11.7345	8.02697	LOD	9.6325	0.196737	0.0776343	0.123352		1.72646	11.7986	8.07076	LOD	9.68505	0.19781	0.0780578	0.124025		LOD
9874.18	LABCO-08	2.06604	12.687	8.17114	LOD	9.14982	0.19566	0.0857243	0.127917		2.04005	12.5274	8.06833	LOD	9.03469	0.193198	0.0846457	0.126308		LOD
10128.8	LABCO-09	2.00158	12.151	7.8426	LOD	8.97025	0.188277	0.0814074	0.11677		2.02735	12.3075	7.9436	LOD	9.08576	0.190701	0.0824557	0.118273		LOD
9616.32	LABCO-OC-01	0.749783	12.7632	8.70162	LOD	10.7088	0.218309	0.0959752	0.15477		0.721015	12.2735	8.36776	LOD	10.2979	0.209933	0.0922928	0.148832		LOD
10166.6	LABCO-OC-03	0.697357	12.0167	8.36603	LOD	10.0731	0.209212	0.0913472	0.148013		0.708972	12.2168	8.50537	LOD	10.2409	0.212696	0.0928687	0.150478		LOD
10259	LABCO-OC-04	0.699383	11.9137	8.35052	LOD	10.0118	0.209076	0.0899812	0.147931		0.717497	12.2223	8.5668	LOD	10.2711	0.214492	0.0923118	0.151762		LOD
10210.2	318	0.783732	12.7625	6.43364	LOD	11.3489	0.186737	0.0811391	0.127079		0.800203	13.0307	6.56886	LOD	11.5874	0.190662	0.0828445	0.12975		LOD
10965.5	439	0.671467	11.7544	8.29574	LOD	9.02402	0.206901	0.0982253	0.144793		0.736296	12.8892	9.09668	LOD	9.89528	0.226877	0.107709	0.158773		LOD
10070.3	446s	0.869755	9.48047	8.45029	LOD	12.6437	0.228686	0.0640213	0.137527		0.875867	9.54709	8.50967	LOD	12.7326	0.230293	0.0644712	0.138494		LOD
9929.06	464	0.748574	13.0231	9.31337	LOD	9.9076	0.240423	0.0948211	0.180761		0.743264	12.9307	9.2473	LOD	9.83731	0.238717	0.0941485	0.179479		LOD
