# Supplementary material for: Cosmogenic 10 Be in pyroxene: laboratory progress, production rate systematics, and application of the 10 Be– 3 He nuclide pair in the Antarctic Dry Valleys
Source: Copernicus journal article supplement (doi:10.5194/gchron-5-301-2023), 2023-07-17
Supplement: Supplementary file 2 [file gchron-5-301-2023-supplement.zip › Table S3 - CRONUS-P He-3 Data.xlsx]

## Sheet: BGC samples
He concentrations in LABCO pyroxene separates - run on BGC "Ohio" system, October 2014.
CRONUS-P standard run with LABCO samples				He-3 concentration		He-4 concentration
Sample	Aliqot	Sample wt (g)	N3 (atoms/g)	delN3 (atoms/g)	N4 (atoms/g)	delN4 (atoms/g)	R/Ra
CRONUS-P	201410a	0.03236	4.68186e+09	7.96105e+07	3.41375e+13	6.21588e+11	99.0947
CRONUS-P	201410c	0.01805	4.73709e+09	1.35561e+08	3.55485e+13	1.87185e+11	96.284
CRONUS-P	201410d	0.04315	4.898e+09	4.48778e+07	3.75265e+13	1.18648e+11	94.3071
Run in adjacent batches (NSI)
CRONUS-P	201409a	0.01102	4.79754e+09	8.28063e+07	3.38685e+13	7.93711e+11	102.35
CRONUS-P	201410a	0.00887	4.7907e+09	8.17501e+07	3.60216e+13	8.42149e+11	96.0948
		Avg/SD	4.78104e+09	8.03324e+07	3.54205e+13	1.48893e+12

## Sheet: CRPG samples
He concentrations in LABCO pyroxene separates - run on SFT "cosmo" using the new induction furnace (Zimmermann et al., 2018) CRPG, may 2019
CRONUS-P standard run with LABCO samples and in adjacent batches
			He-3 concentration		He-4 concentration
Sample	Date	Sample wt (g)	N3 (atoms/g)	delN3 (atoms/g)	N4 (atoms/g)	delN4 (atoms/g)	R/Ra
CRONUS-P Caltech	2019-04-01	0.0275	4.903e+09	1.03425e+08	3.62448e+13	2.91802e+11	97.7417
CRONUS-P Caltech	2019-04-01	0.0166	5.05594e+09	1.0499e+08	3.78894e+13	3.3895e+11	96.4158
CRONUS-P Caltech	2019-03-04	0.0296	5.00847e+09	9.90111e+07	3.71768e+13	2.93941e+11	97.3412
CRONUS-P Lamont	2019-03-04	0.0331	4.89493e+09	9.63068e+07	3.9026e+13	3.00817e+11	90.6268
CRONUS_P-1 Caltech	2019-04-15	0.0216	5.09603e+09	1.0555e+08	3.51351e+13	2.97991e+11	104.799
CRONUS_P-2 Caltech	2019-04-16	0.0196	5.18203e+09	1.05337e+08	3.6413e+13	3.14028e+11	102.827
CRONUS_P_1	2019-04-29	0.0251	5.22798e+09	1.05383e+08	3.64409e+13	2.968e+11	103.659
CRONUS_P_2	2019-04-29	0.0225	4.98636e+09	1.03657e+08	3.6146e+13	3.0179e+11	99.6751
		Avg/SD	5.04434e+09	1.20971e+08	3.6809e+13	1.19939e+12
			4.78104e+09	8.03324e+07	3.54205e+13	1.48893e+12

## Sheet: LDEO samples
He concentrations in LABCO pyroxene separates - run at LDEO, 2017 and 2021
CRONUS-P standard run with LABCO samples			He-3 concentration		He-4 concentration
Sample	Date	Sample wt (g)	N3 (atoms/g)	delN3 (atoms/g)	N4 (atoms/g)	delN4 (atoms/g)	R/Ra
CPX-187	2021-08-06	0.0243	4.98591e+09	1.09184e+08	3.12564e+13	4.26687e+12	115.257
CPX-155	2017-03-15		5.28241e+09	8.45139e+07	3.81636e+13	7.05129e+11	100.011
CPX-156	2017-03-31		5.21613e+09	8.32236e+07	3.87853e+13	7.01983e+11	97.1728
CPX-185	2021-08-04	0.0153	5.36237e+09	1.17497e+08	3.231e+13	6.77389e+12	119.918
CPX-186	2021-08-05	0.0164	4.94276e+09	1.09018e+08	3.0574e+13	6.31939e+12	116.81
		Avg/SD	5.15792e+09	1.84773e+08
